# Supplementary material for: Synthesis and Investigation of the G-Quadruplex Binding Properties of Kynurenic Acid Derivatives with a Dihydroimidazoquinoline-3,5-dione Core
Source: MDPI journal article supplement (doi:10.3390/molecules27092791), 2022-04-27
Supplement: s1 [file s1]

# Synthesis and investigation of G-quadruplex binding properties of Kynurenic acid derivatives with a dihydroimidazoquinoline-3,5-dione core

Stefania Mazzini, Salvatore Princiotto \*, Loana Musso, Daniele Passarella, Giovanni Luca Beretta, Paola Perego, Sabrina Dallavalle

Department of Food, Environmental and Nutritional Sciences (DeFENS), University of Milan, Via Celoria 2, 20133 Milan, Italy; [stefania.mazzini@unimi.it](mailto:stefania.mazzini@unimi.it) (S.M.); [salvatore.princiotto@unimi.it](mailto:salvatore.princiotto@unimi.it) (S.P.); [loana.musso@unimi.it](mailto:loana.musso@unimi.it) (L.M.); [sabrina.dallavalle@unimi.it](mailto:sabrina.dallavalle@unimi.it) (S.D.)

Department of Chemistry, University of Milan, 20133 Milan, Italy; [daniele.passarella@unimi.it](mailto:daniele.passarella@unimi.it)

Molecular Pharmacology Unit, Department of Applied Research and Technological Development, Fondazione IRCCS Istituto Nazionale Tumori, Via Amadeo 42, 20133 Milan, Italy; [giovanni.beretta@istitutotumori.mi.it](mailto:giovanni.beretta@istitutotumori.mi.it) (G.L.B.); [paola.perego@istitutotumori.mi.it](mailto:paola.perego@istitutotumori.mi.it) (P.P.)

## Supplementary Material

### Table of contents

**Table S1.** Selected  $^1\text{H}$  NMR chemical shift values for the complex of **9** with 5'-d(CGTACG)<sub>2</sub>-3' and 5'-d(AAGAATTCTT)<sub>2</sub>-3' duplexes. **S2**

**Table S2.** Selected  $^1\text{H}$  chemical shift values for the complex of **9** with d(TTAGGGT)<sub>4</sub>. **S3**

**Figure S1:** NOESY spectrum of **9** in H<sub>2</sub>O/D<sub>2</sub>O (9:1), 100 mM NaCl, 10 mM sodium phosphate buffer (pH 7.0), T = 25 °C. **S3**

**Figure S2.** Aromatic and anomeric protons region of NOESY spectrum of 5'-d(CGTACG)<sub>2</sub>-3' with **9**,  $t_{\text{mix}} = 300$  ms, at 15 °C in H<sub>2</sub>O/D<sub>2</sub>O (9:1), 100 mM NaCl, 10 mM sodium phosphate buffer (pH 7.0), at R = [9]/[DNA] = 2.0. The arrows indicate the broad proton signals of compound **9**. **S4**

**Figure S3.** Aromatic protons region of NOESY spectrum of 5'-d-(AAGAATTCTT)<sub>2</sub>-3' with **9**,  $t_{\text{mix}}=300\text{ms}$  at 15 °C in H<sub>2</sub>O/D<sub>2</sub>O (9:1), 100 mM NaCl, 10 mM sodium phosphate buffer (pH 7.0), at R = [9]/[DNA] = 2.0. The arrows indicate the broad proton signals of compound **9**. **S4**

**Figure S4.** Imino and aromatic proton region of NOESY spectrum of d(TTAGGGT)<sub>4</sub> with **9**,  $t_{\text{mix}}=300\text{ms}$ , at 25 °C in H<sub>2</sub>O/D<sub>2</sub>O (9:1), 150 mM KCl, 25 mM K<sup>+</sup> phosphate buffer, EDTA 1 mM (pH 6.7), at R = [9]/[DNA] = 4.0. The arrows indicate the broad proton signals of **9**. **S5**

$^1\text{H}$ -NMR and  $^{13}\text{C}$ -NMR spectra of synthesized compounds **S6-S15**

**Table S1.** Selected  $^1\text{H}$  NMR chemical shift values for the complex of **9** with 5'-d(CGTACG)<sub>2</sub>-3' and 5'-d(AAGAATTCTT)<sub>2</sub>-3' duplexes<sup>a,b</sup>.

| 6-mer | H2/H5/CH <sub>3</sub> | $\Delta\delta^c$ | H6/H8 | $\Delta\delta^c$ | H1'  | $\Delta\delta^c$ |
|-------|-----------------------|------------------|-------|------------------|------|------------------|
| C1    | 5.90                  | 0.04             | 7.68  | -0.02            | 5.76 | 0.00             |
| G2    | -                     | -                | 8.03  | 0.00             | 5.99 | -0.04            |
| T3    | 1.57                  | -0.01            | 7.31  | -0.01            | 5.65 | -0.05            |
| A4    | 7.59                  | -0.09            | 8.38  | +0.03            | 6.22 | -0.08            |
| C5    | 5.39                  | -0.02            | 7.31  | -0.01            | 5.65 | 0.00             |
| G6    | -                     | -                | 7.92  | 0.00             | 6.11 | 0.00             |
|       | NH                    |                  |       |                  |      |                  |
| C1G6  | -                     | -                |       |                  |      |                  |
| G2C5  | 12.76                 | -0.18            |       |                  |      |                  |
| T3A4  | 13.60                 | -0.07            |       |                  |      |                  |

  

| 10-mer | H2/H5/CH <sub>3</sub> | $\Delta\delta^c$ | H6/H8 | $\Delta\delta^c$ |
|--------|-----------------------|------------------|-------|------------------|
| A1     | -                     | -                | 7.81  | -0.20            |
| A2     | -                     | -                | 8.10  | 0.00             |
| G3     | -                     | -                | 7.69  | -0.01            |
| A4     | 7.25                  | +0.03            | 8.10  | +0.02            |
| A5     | 7.69                  | -0.09            | 8.10  | 0.00             |
| T6     | 1.27                  | -0.03            | 7.10  | 0.00             |
| T7     | 1.54                  | -0.04            | 7.39  | -0.05            |
| C8     | 5.63                  | -0.05            | 7.69  | -0.06            |
| T9     | 1.73                  | -0.07            | 7.50  | -0.09            |
| T10    | 1.73                  | -0.08            | 7.50  | -0.13            |
|        | NH                    |                  |       |                  |
| G3C8   | 12.32                 | -0.08            |       |                  |
| A4T7   | 13.65                 | -0.10            |       |                  |
| A5T6   | 13.58                 | -0.10            |       |                  |

<sup>a</sup>Measured at 15 °C in H<sub>2</sub>O/D<sub>2</sub>O (9:1), 100 mM NaCl, 10 mM sodium phosphate buffer (pH 7.0) and R = 2.0.

<sup>b</sup>Measured in ppm from external DSS.

<sup>c</sup> $\Delta\delta = \delta_{\text{bound}} - \delta_{\text{free}}$ .

**Table S2.** Selected  $^1\text{H}$  chemical shift values for the complex of **9** with  $\text{d}(\text{TTAGGGT})_4^{\text{a}}$

| complex with <b>9</b> |          |                           |       |                |
|-----------------------|----------|---------------------------|-------|----------------|
|                       | H1/H2/Me | $\Delta\delta^{\text{b}}$ | H6/H8 | $\Delta\delta$ |
| T1                    | n.d.     | -                         | 7.55  | +0.05          |
| T2                    | 1.83     | + 0.08                    | 7.37  | +0.06          |
| A3                    | 8.09     | - 0.08                    | 8.44  | +0.05          |
| G4                    | 11.52    | - 0.09                    | 7.85  | -0.09          |
| G5                    | 11.15    | - 0.07                    | 7.68  | - 0.05         |
| G6                    | 10.80    | - 0.21                    | 7.71  | - 0.05         |
| T7                    | 1.75     | +0.15                     | 7.54  | +0.25          |

<sup>a</sup>Measured at 25 °C in ppm ( $\delta$ ) from external DSS. Solvent  $\text{H}_2\text{O}-\text{D}_2\text{O}$  (90:10 v/v), 25 mM  $\text{K}^+$  phosphate buffer, 150 mM KCl, 1 mM EDTA, pH 6.7.  $R = [\text{ligand}] / [\text{DNA}] = 2.0$ . T1 signals were not detected. The ribose protons showing significant shift variations are: T2H1'  $\Delta\delta = +0.28$ ; T7H1'  $\Delta\delta = +0.14$ .

<sup>b</sup> $\Delta\delta = \delta_{\text{bound}} - \delta_{\text{free}}$ .

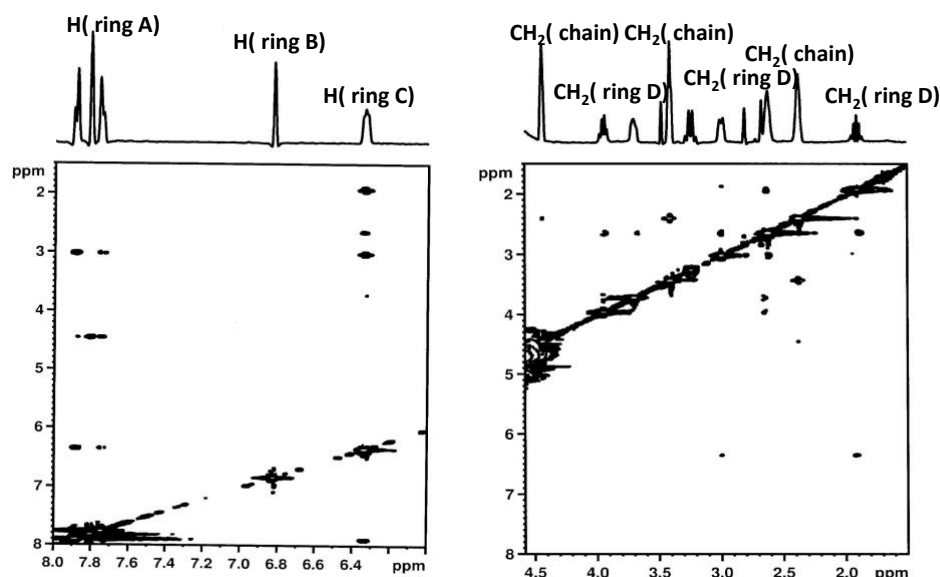

**Figure S1:** NOESY spectrum of **9** in  $\text{H}_2\text{O}/\text{D}_2\text{O}$  (9:1), 100 mM NaCl, 10 mM sodium phosphate buffer (pH 7.0),  $T = 25\text{ }^\circ\text{C}$ .

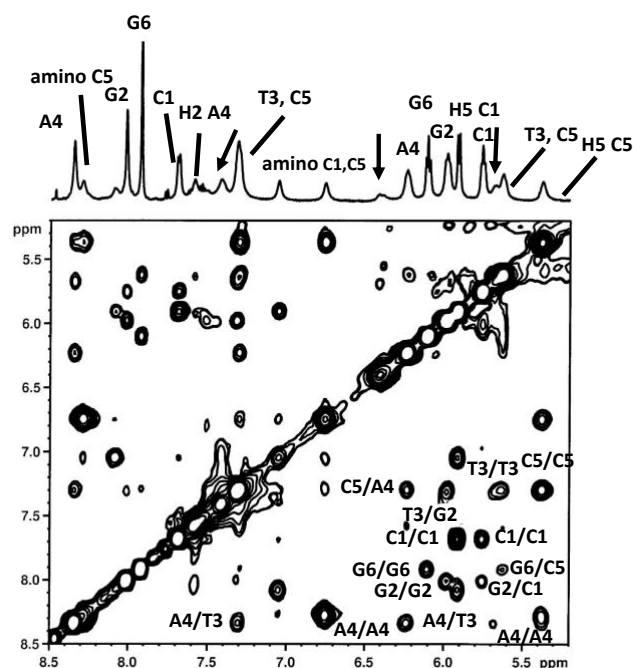

**Figure S2.** Aromatic and anomeric protons region of NOESY spectrum of 5'-d(CGTACG)<sub>2</sub>-3' with **9**,  $t_{\text{mix}} = 300$  ms, at 15 °C in H<sub>2</sub>O/D<sub>2</sub>O (9:1), 100 mM NaCl, 10 mM sodium phosphate buffer (pH 7.0), at  $R = [\mathbf{9}]/[\text{DNA}] = 2.0$ . The arrows indicate the broad proton signals of compound **9**.

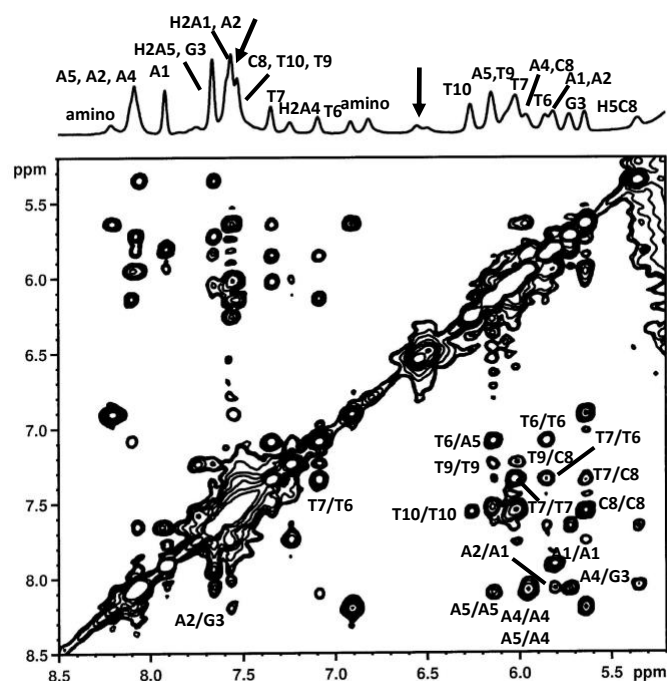

**Figure S3.** Aromatic protons region of NOESY spectrum of 5'-d-(AAGAATTCTT)<sub>2</sub>-3' with **9**,  $t_{\text{mix}} = 300$  ms at 15 °C in H<sub>2</sub>O/D<sub>2</sub>O (9:1), 100 mM NaCl, 10 mM sodium phosphate buffer (pH 7.0), at  $R = [\mathbf{9}]/[\text{DNA}] = 2.0$ . The arrows indicate the broad proton signals of compound **9**.

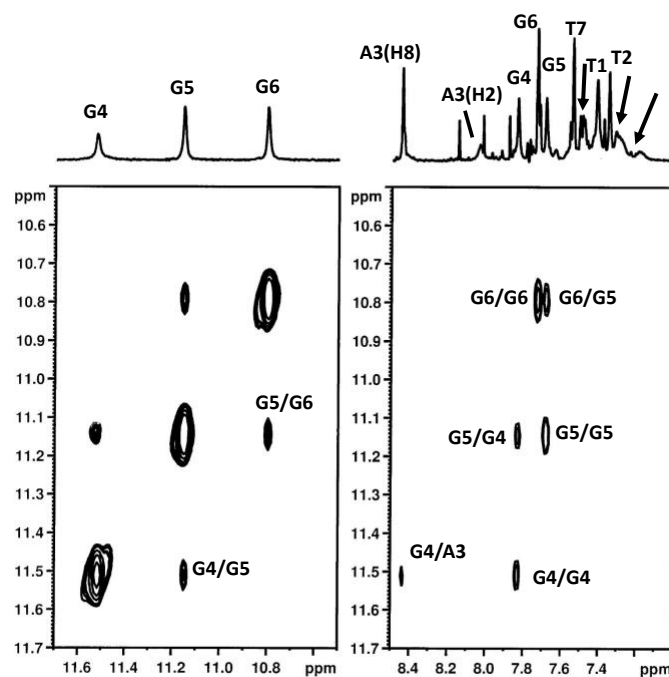

**Figure S4.** Imino and aromatic protons region of NOESY spectrum of d(TTAGGGT)<sub>4</sub> with **9**,  $t_{\text{mix}} = 300$  ms, at 25 °C in H<sub>2</sub>O/D<sub>2</sub>O (9:1), 150 mM KCl, 25 mM K<sup>+</sup> phosphate buffer, EDTA 1 mM (pH 6.7), at  $R = [\mathbf{9}]/[\text{DNA}] = 4.0$ . The arrows indicate the broad proton signals of **9**.

$^1\text{H}$ -NMR of compound **4a** in  $\text{DMSO-}d_6$

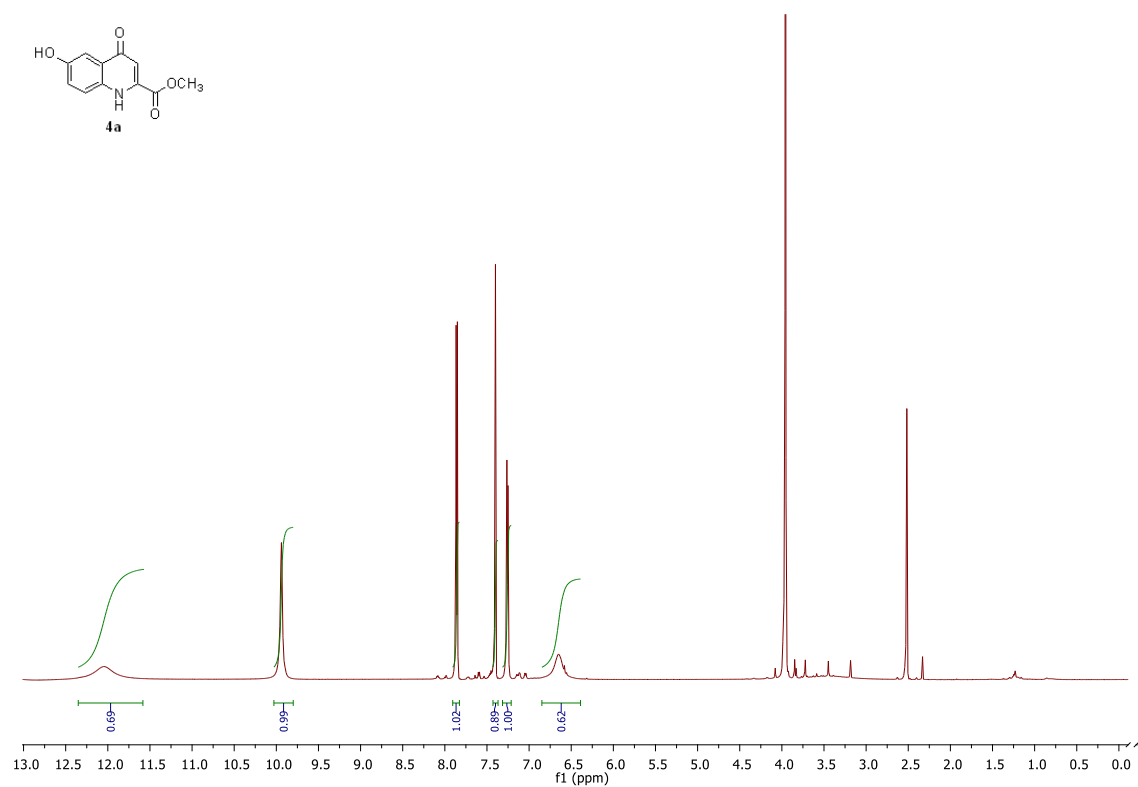

$^{13}\text{C}$ -NMR of compound **4a** in  $\text{DMSO-}d_6$

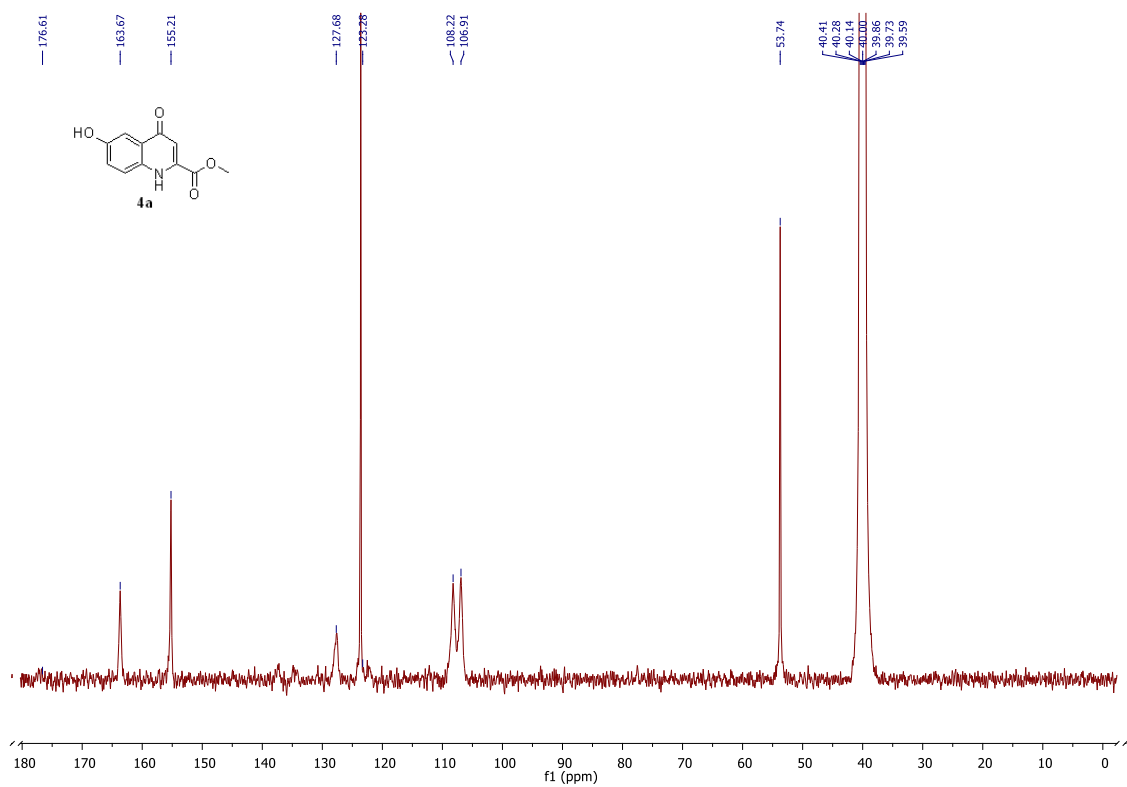

$^1\text{H}$ -NMR of compound **5a** in  $\text{DMSO-}d_6$

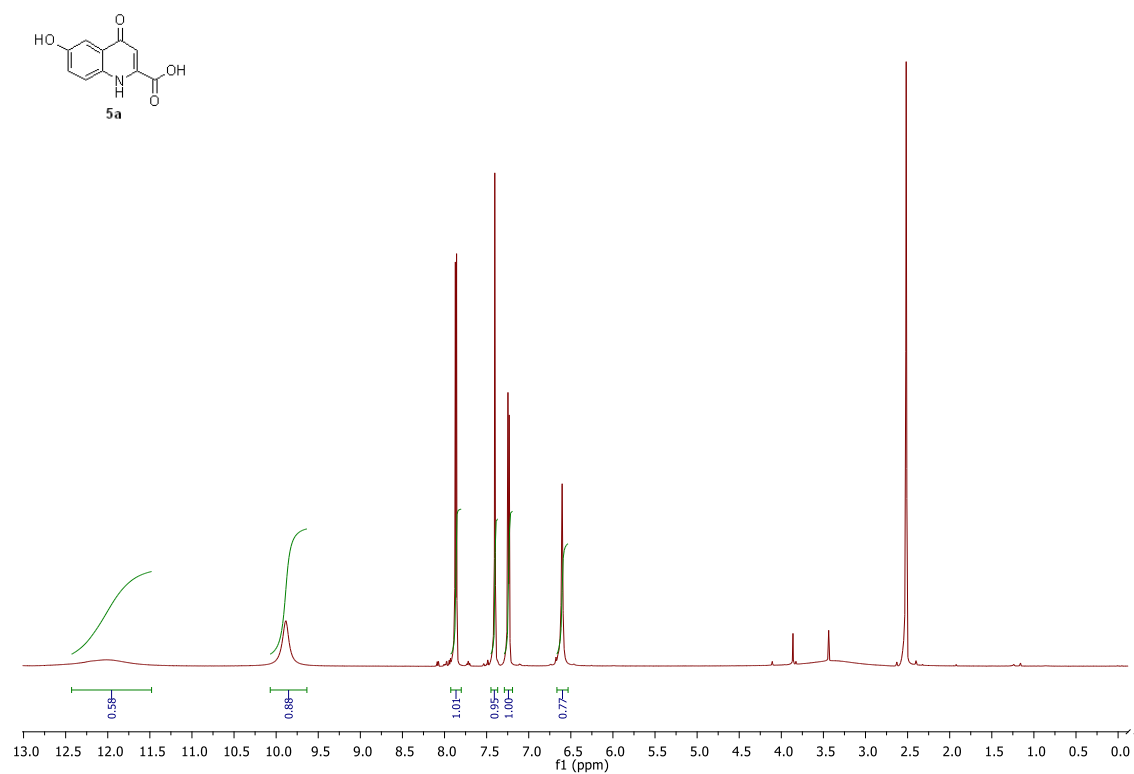

$^{13}\text{C}$ -NMR of compound **5a** in  $\text{DMSO-}d_6$

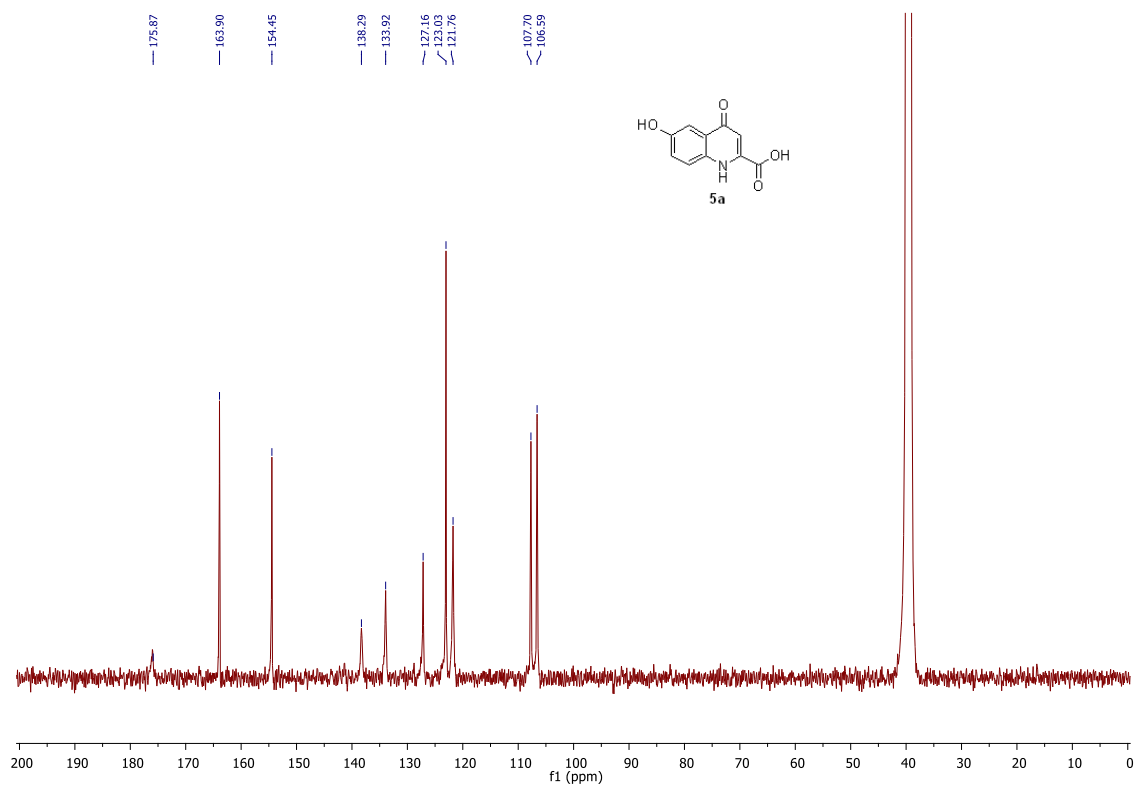

$^1\text{H}$ -NMR of compound **6a** in  $\text{DMSO-}d_6$

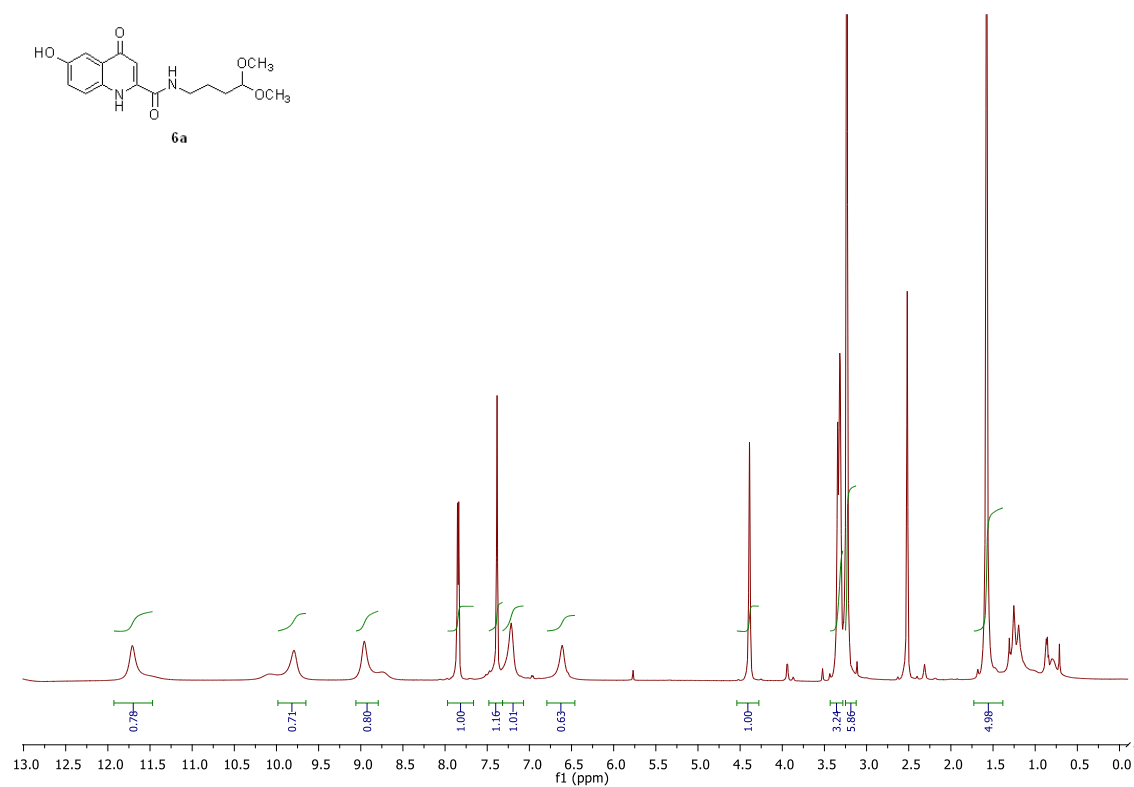

$^{13}\text{C}$ -NMR of compound **6a** in  $\text{DMSO-}d_6$

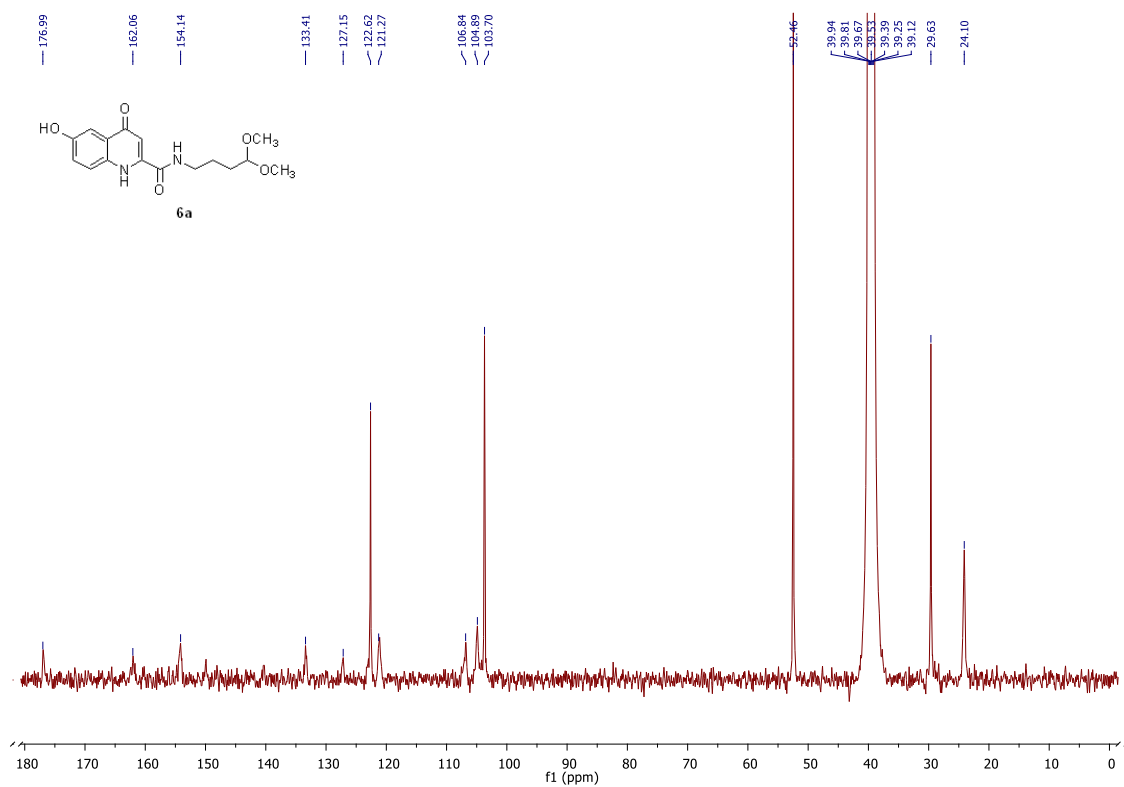



$^1\text{H}$ -NMR of compound **7a** in  $\text{DMSO-}d_6$

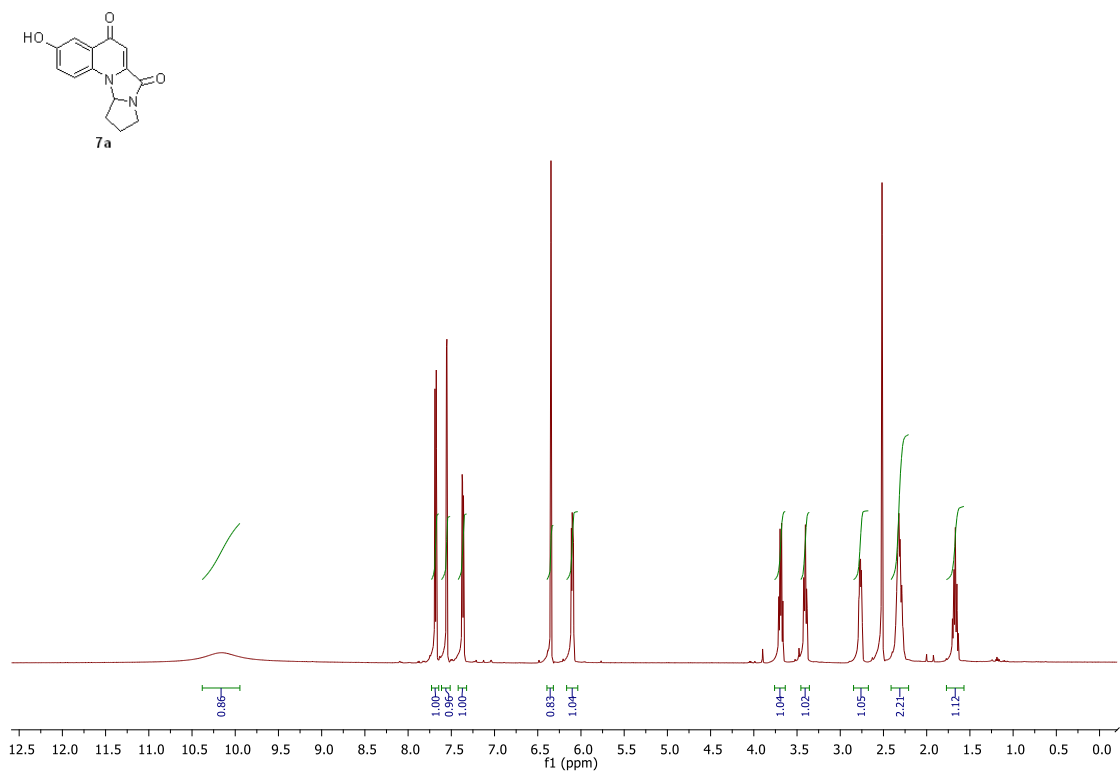

$^{13}\text{C}$ -NMR of compound **7a** in  $\text{DMSO-}d_6$

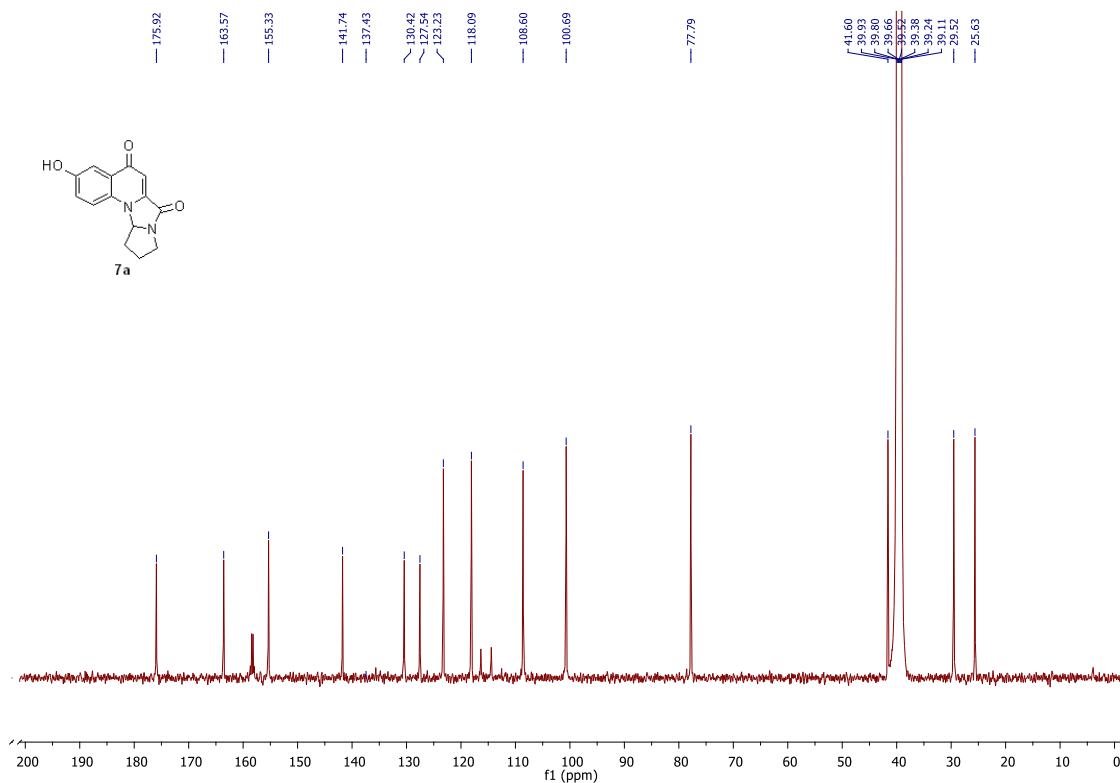

NMR spectra of compounds **6b** and **7b** are reported in R. Cincinelli et al. *Tetrahedron* **70** (2014) 9797-9804.

$^1\text{H}$ -NMR of compound **8** in  $\text{DMSO}-d_6$

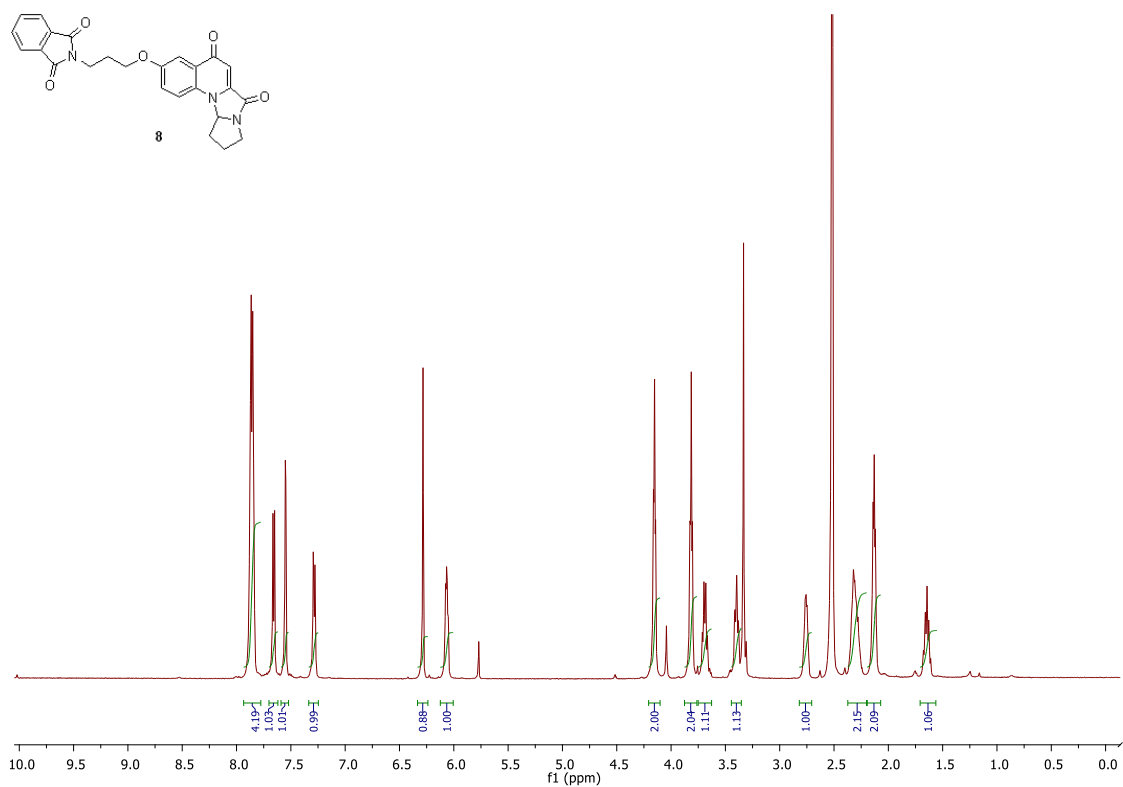

$^{13}\text{C}$ -NMR of compound **8** in  $\text{DMSO}-d_6$

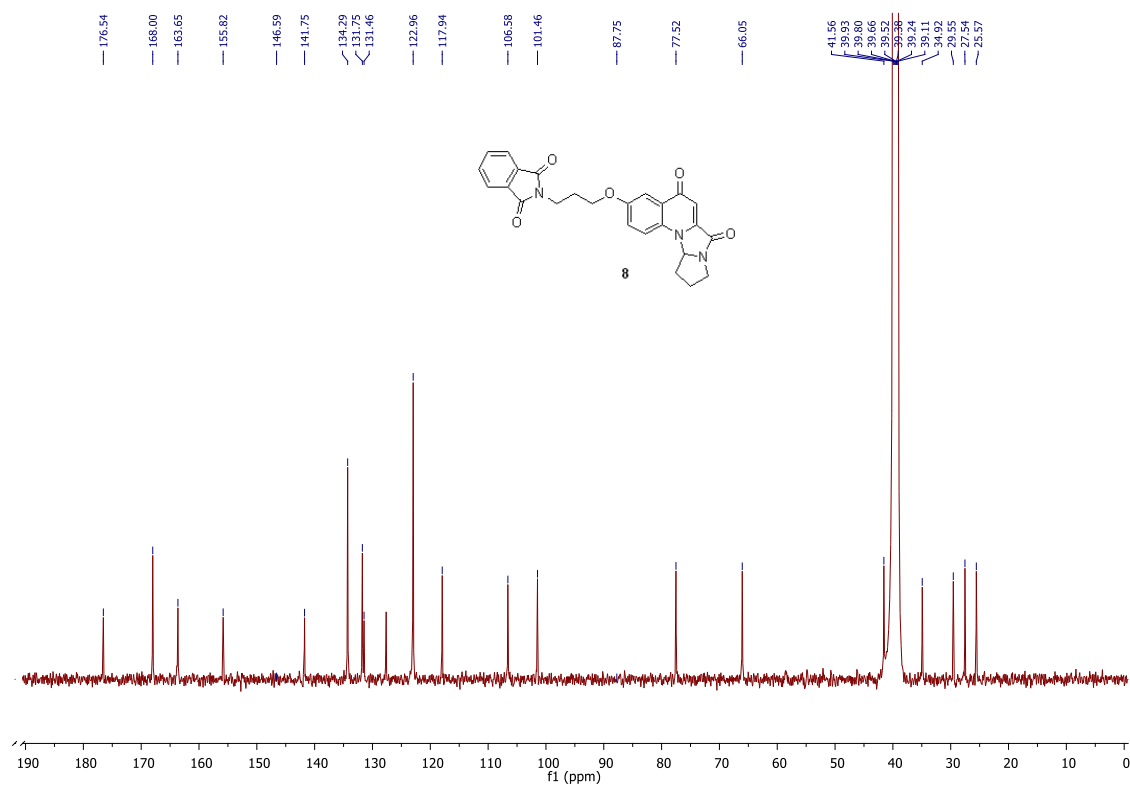

<sup>1</sup>H-NMR of compound **9** in CH<sub>3</sub>OH-*d*<sub>4</sub>

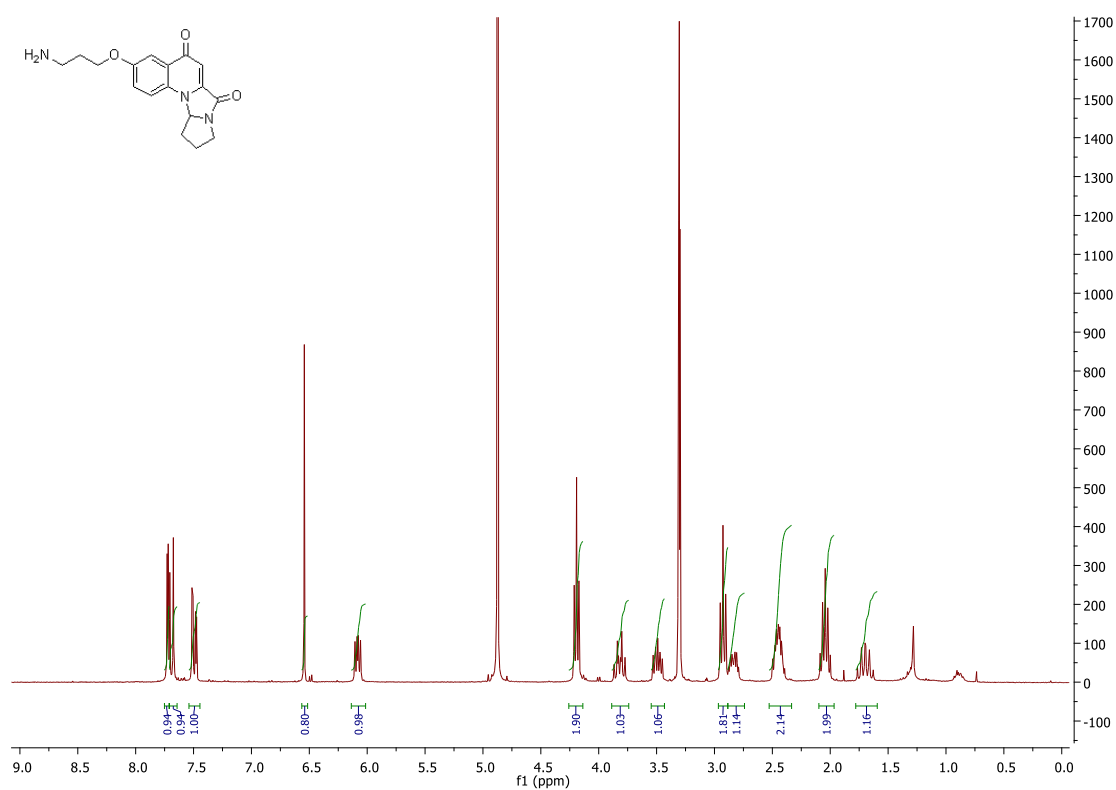

<sup>13</sup>C-NMR of compound **9** in DMSO-*d*<sub>6</sub>.

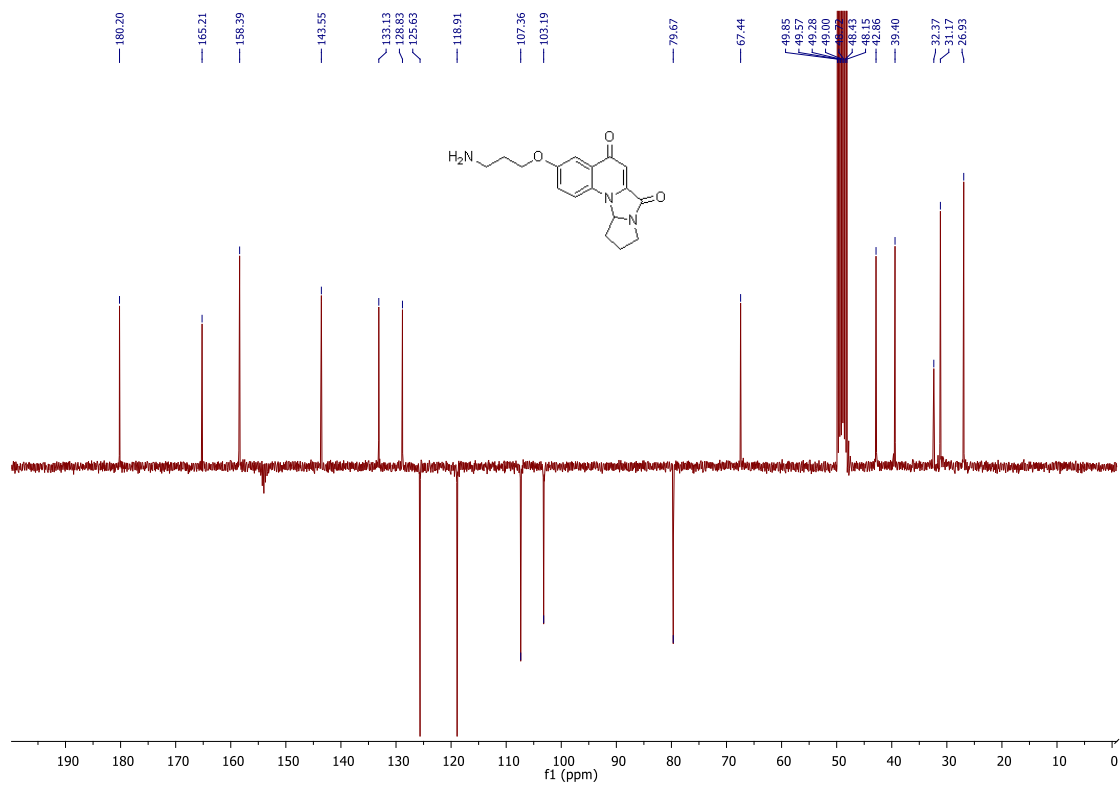

$^1\text{H}$ -NMR of compound **10** in  $\text{DMSO}-d_6$ .

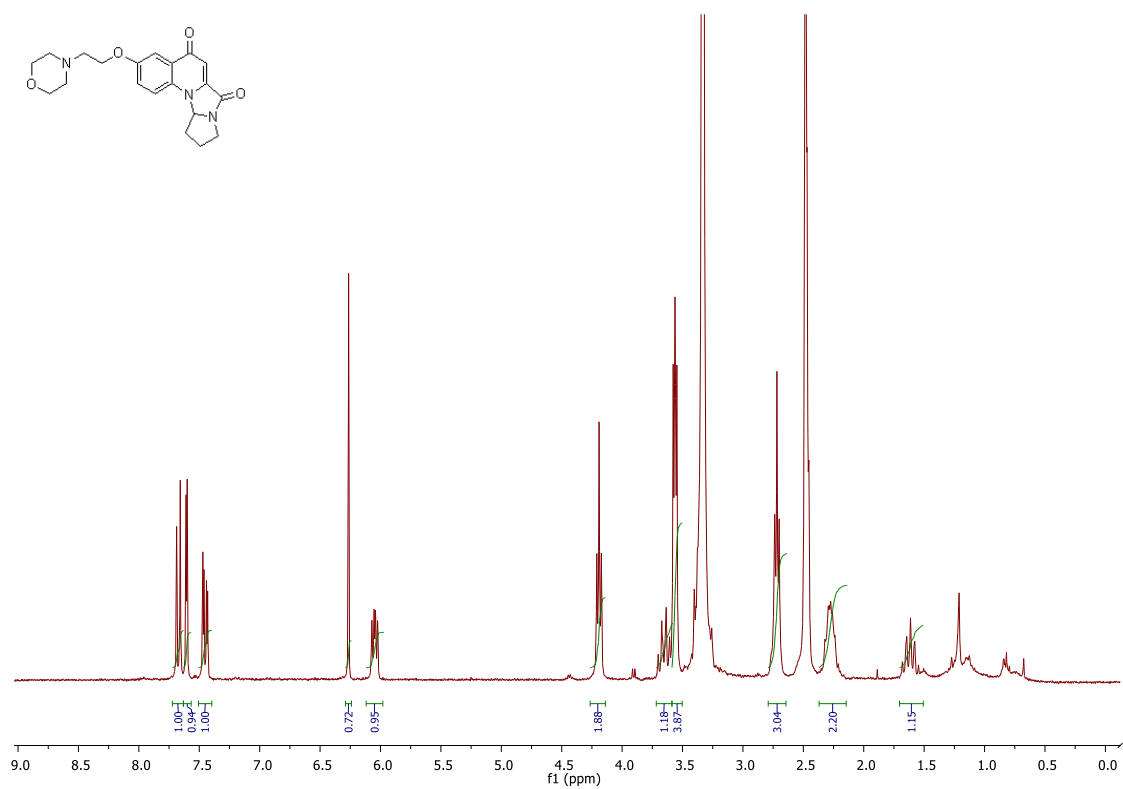

$^{13}\text{C}$ -NMR of compound **10** in  $\text{DMSO}-d_6$

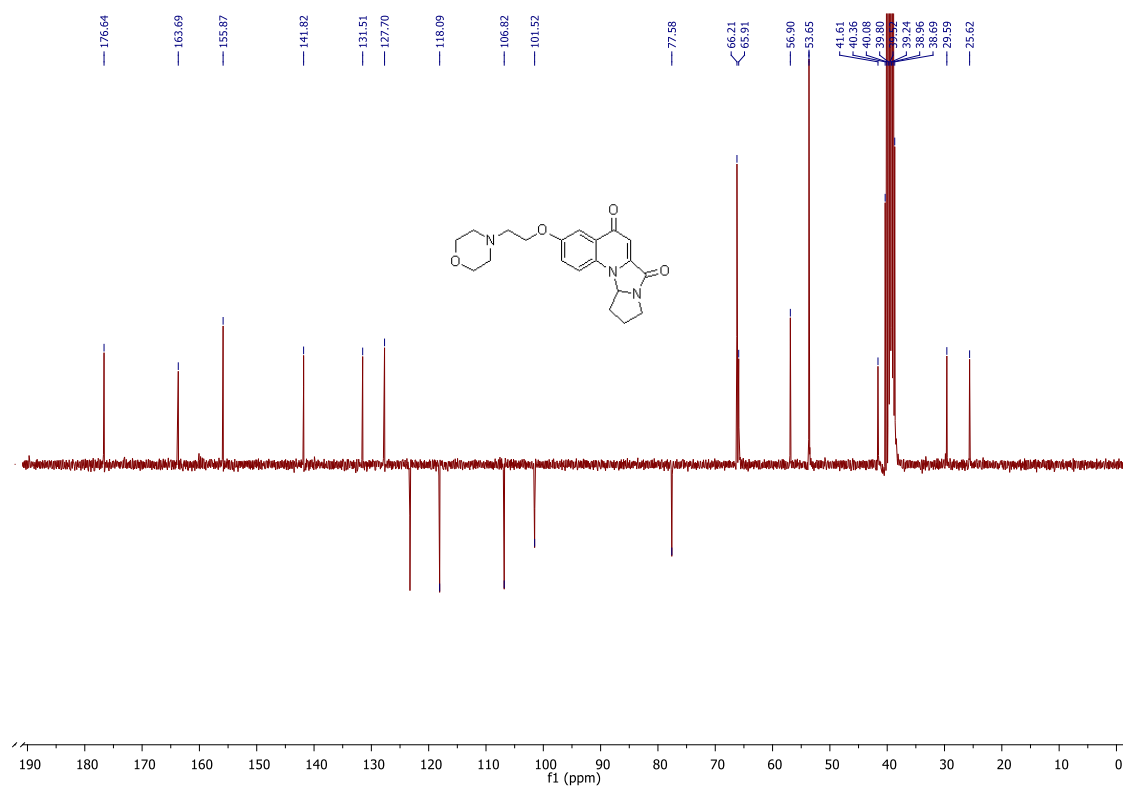

<sup>1</sup>H-NMR of compound **11** in CDCl<sub>3</sub>

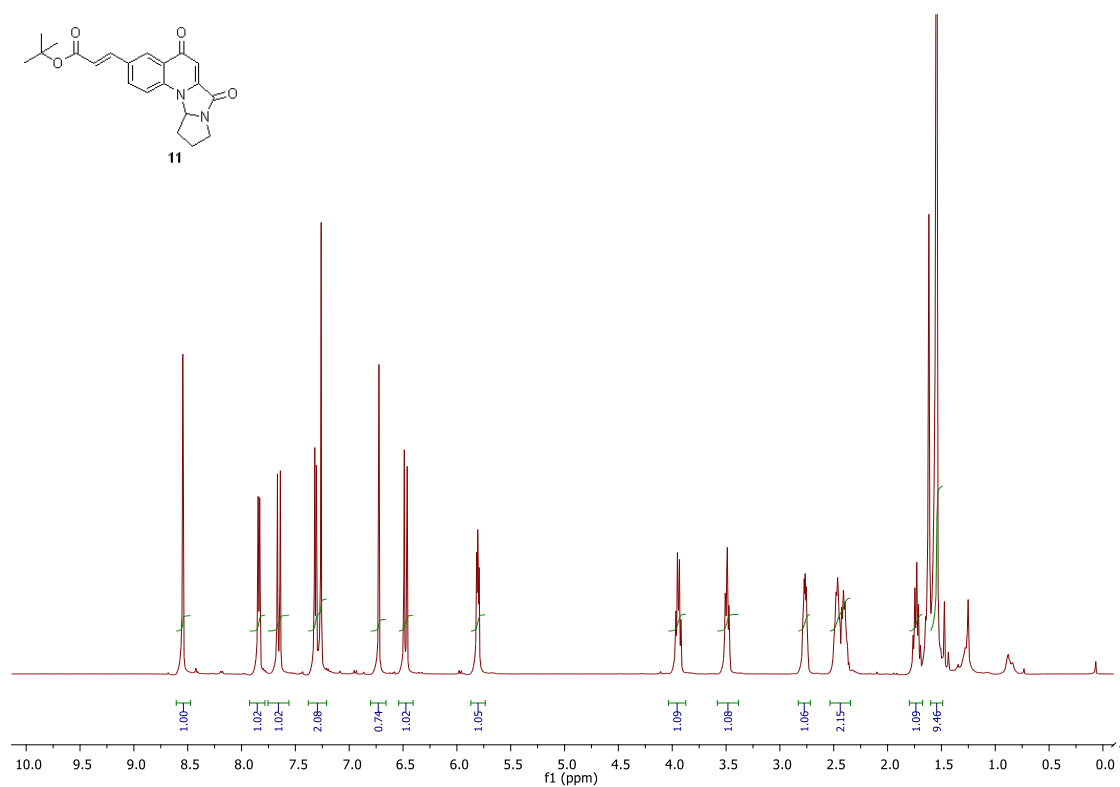

<sup>13</sup>C-NMR of compound **11** in CDCl<sub>3</sub>

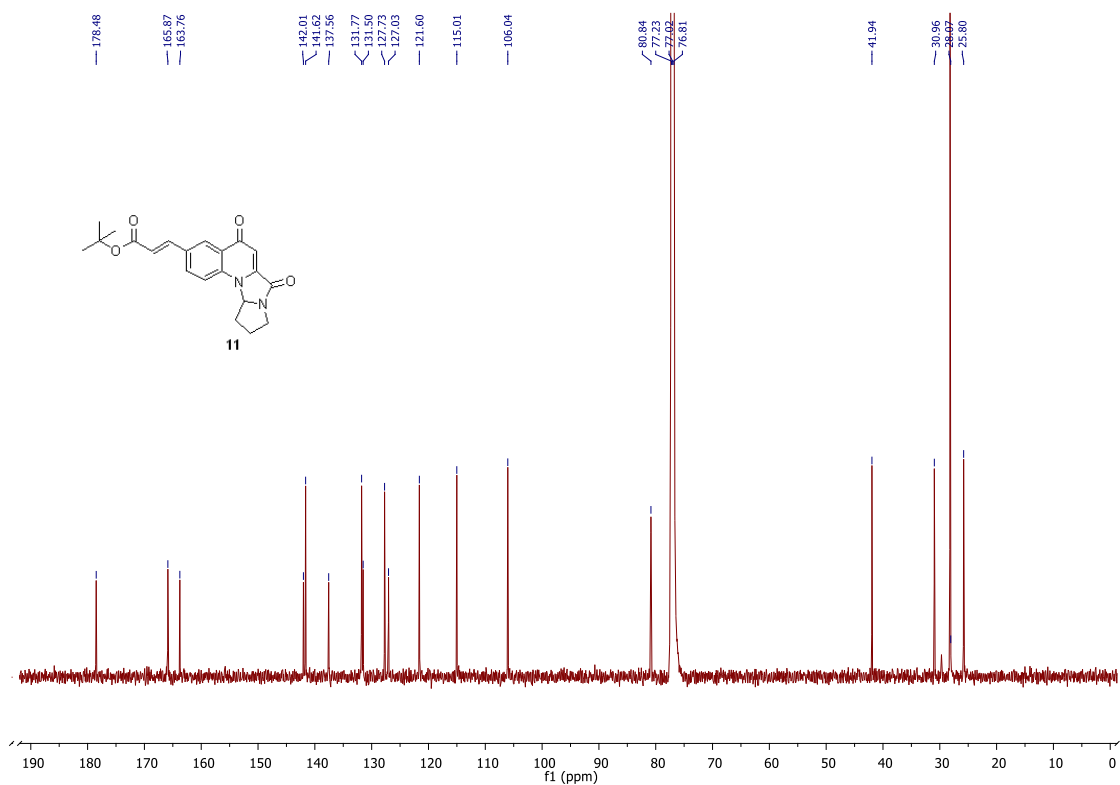

$^1\text{H}$ -NMR of compound **12** in  $\text{DMSO}-d_6$

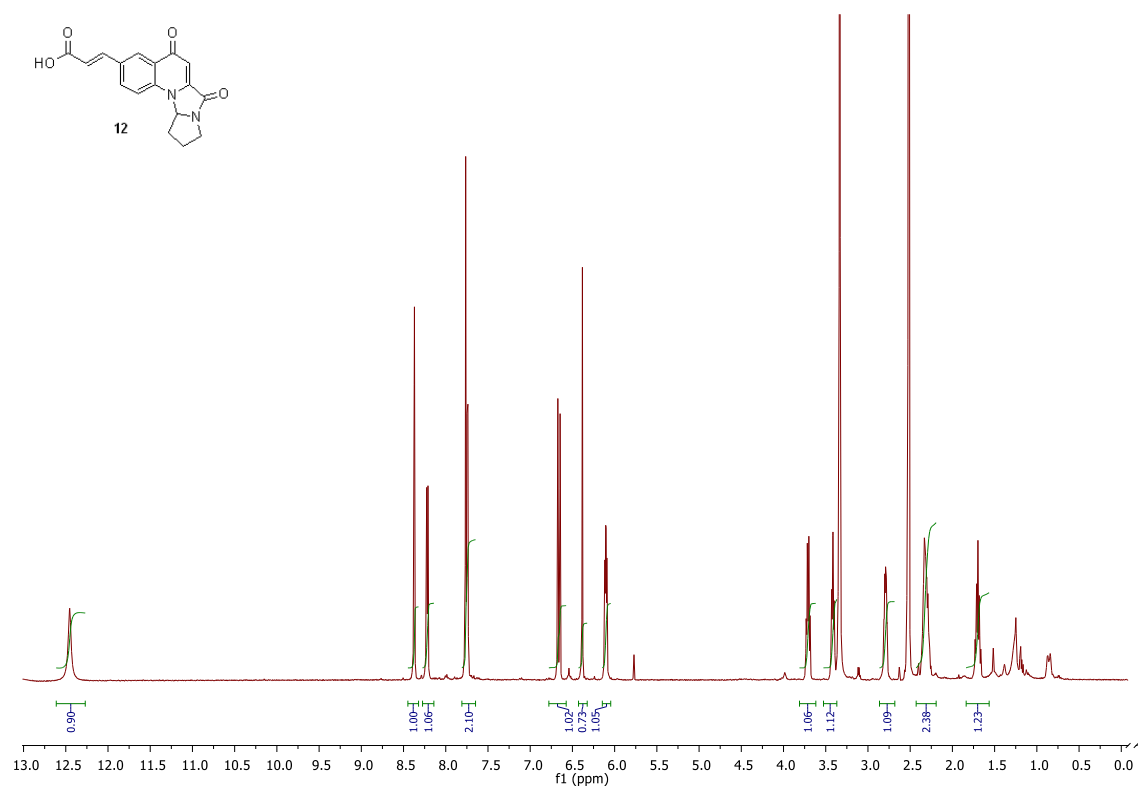

$^{13}\text{C}$ -NMR of compound **12** in  $\text{DMSO}-d_6$

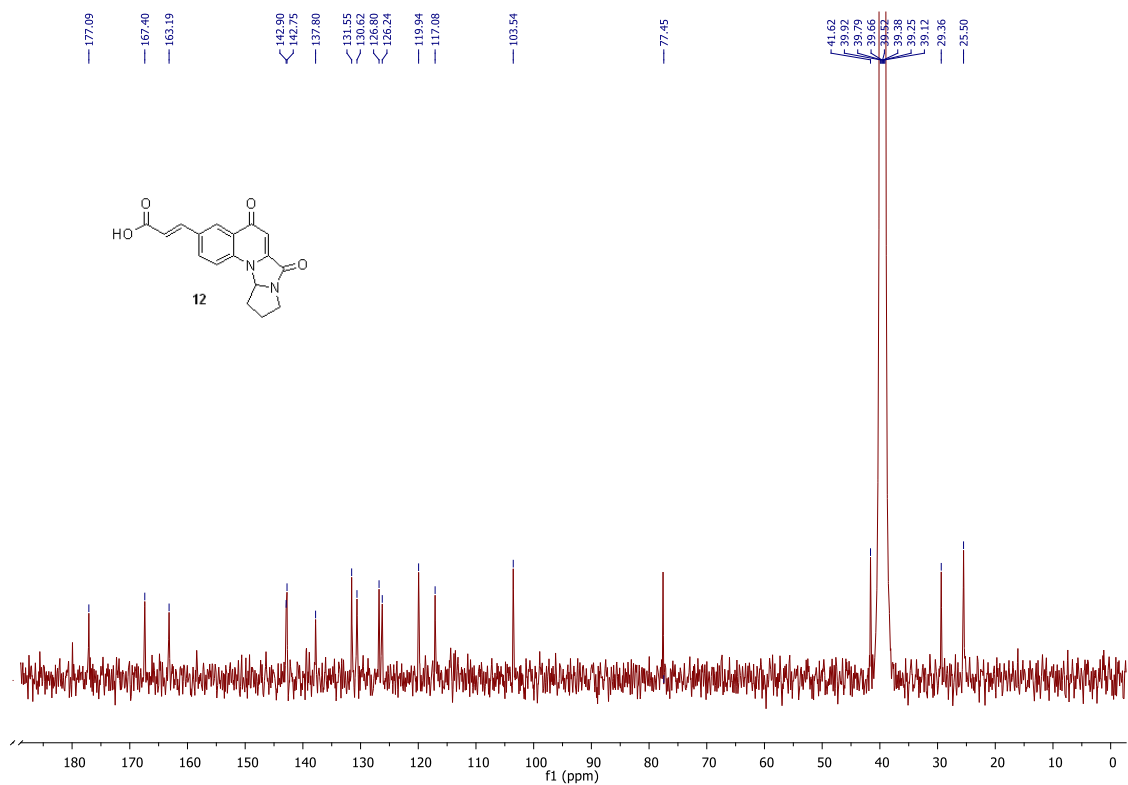

$^1\text{H}$ -NMR of compound **13** in  $\text{DMSO-}d_6$

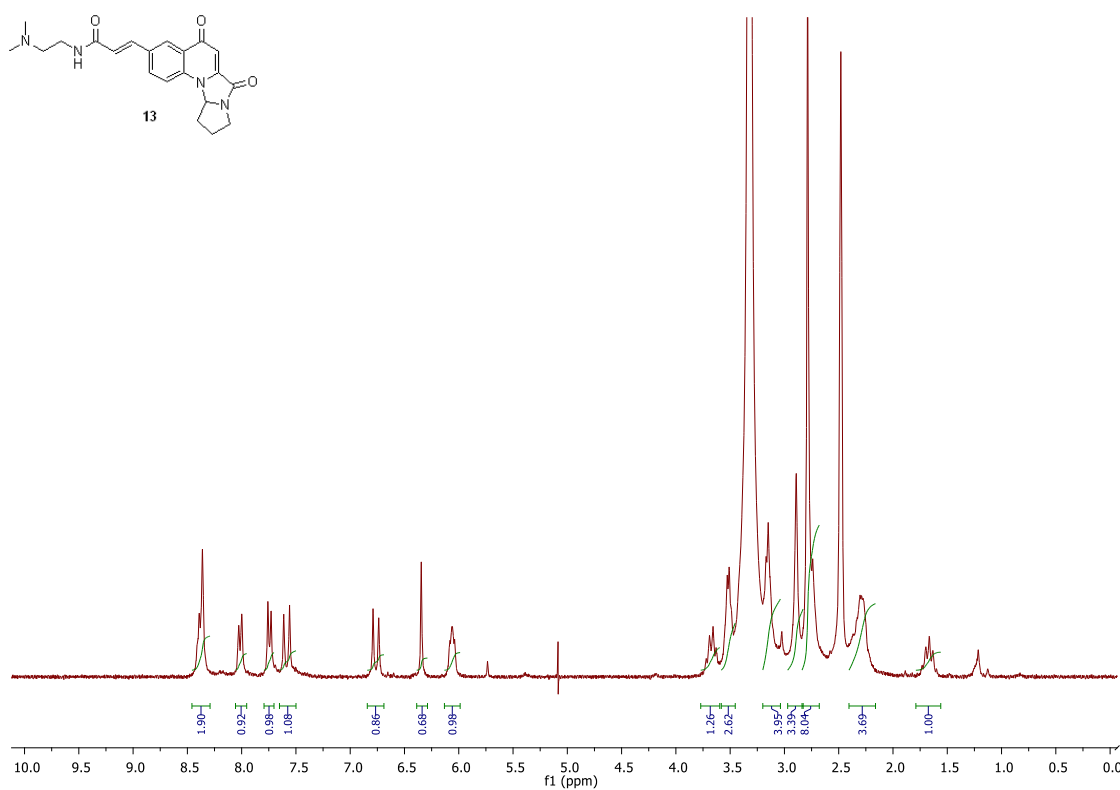

$^{13}\text{C}$ -NMR of compound **13** in  $\text{DMSO-}d_6$

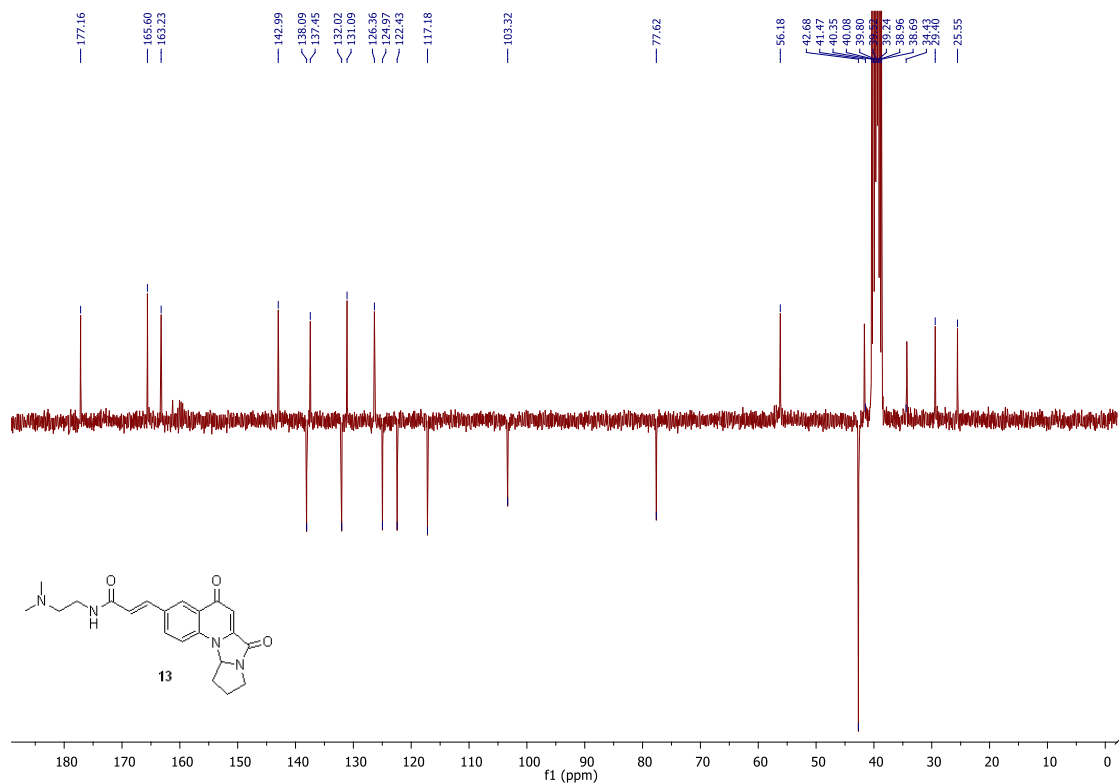

The hydrochloric salts **9**, **10**, and **14** were prepared by treatment of the corresponding free bases with 0.5 N HCl in methanol.
